# Supplementary material
Source: PubMed Central journal article supplement (PMC8315410)
Supplement: NIHMS1688738-supplement-Table_S1.pdf [file NIHMS1688738-supplement-Table_S1.pdf]

kTable S1. Comparison of least square means of total bacterial load and Shannon alpha diversity by site in individuals on versus those off acid blockade.

| Location           | Total Bacterial Load |             |               | Shannon Alpha Diversity |             |               |
|--------------------|----------------------|-------------|---------------|-------------------------|-------------|---------------|
|                    | Off                  | On          | Sidak P-value | Off                     | On          | Sidak P-value |
| Nares              | 4.37 (0.16)          | 3.82 (0.17) | 0.89          | 1.62 (0.22)             | 2.01 (0.25) | 0.99          |
| Oral string        | 5.43 (0.16)          | 5.21 (0.18) | 0.99          | 3.72 (0.23)             | 3.57 (0.25) | 0.99          |
| Oropharyngeal      | 5.56 (0.20)          | 5.96 (0.30) | 0.99          | 3.72 (0.28)             | 3.79 (0.42) | 0.99          |
| Sputum             | 6.43 (0.24)          | 6.35 (0.30) | 0.99          | 2.81 (0.35)             | 3.14 (0.42) | 0.99          |
| Proximal Esophagus | 5.90 (0.15)          | 5.78 (0.17) | 0.99          | 3.84 (0.21)             | 3.72 (0.24) | 0.99          |
| Distal esophagus   | 6.14 (0.15)          | 5.97 (0.17) | 0.99          | 3.70 (0.21)             | 3.53 (0.24) | 0.99          |
| Gastric            | 6.17 (0.16)          | 5.94 (0.17) | 0.99          | 3.73 (0.22)             | 3.75 (0.24) | 0.99          |
| Duodenal           | 6.26 (0.27)          | 6.16 (0.20) | 0.99          | 4.16 (0.38)             | 3.68 (0.28) | 0.99          |
